## RESEARCH ARTICLE

# Indications, types, and diagnostic implications of prenatal genetic testing in Sub-Saharan Africa: A descriptive study

Abraham Fessehaye Sium<sup>1\*</sup>, Tariku Shimels<sup>2</sup>, Abdulfetah Abdulkadir Abdosh<sup>1</sup>, Tesfaye Diress<sup>1</sup>, Tigist Tsegaye<sup>3</sup>, Tizibt Yiflashewa<sup>3</sup>, Zewdu Terefe<sup>3</sup>, Wondimu Gudu<sup>1</sup>

**1** Department of obstetrics and Gynecology, St Paul's Hospital Millennium Medical College, Addis Ababa, Ethiopia, **2** St. Paul's Hospital Millennium Medical College, Addis Ababa, Ethiopia, **3** MRC-ET Advanced Laboratory, Addis Ababa, Ethiopia

\* [abrahamfessehaye4@gmail.com](mailto:abrahamfessehaye4@gmail.com)

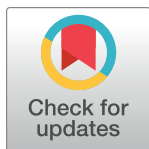

## OPEN ACCESS

**Citation:** Sium AF, Shimels T, Abdosh AA, Diress T, Tsegaye T, Yiflashewa T, et al. (2023) Indications, types, and diagnostic implications of prenatal genetic testing in Sub-Saharan Africa: A descriptive study. PLoS ONE 18(11): e0294409. <https://doi.org/10.1371/journal.pone.0294409>

**Editor:** Lingshan Gou, Xuzhou Maternity and Child Health Care Hospital affiliated to Xuzhou Medical UniversityCare Hospital Affiliated to Xuzhou Medical University, CHINA

**Received:** August 11, 2023

**Accepted:** October 31, 2023

**Published:** November 16, 2023

**Copyright:** © 2023 Sium et al. This is an open access article distributed under the terms of the [Creative Commons Attribution License](https://creativecommons.org/licenses/by/4.0/), which permits unrestricted use, distribution, and reproduction in any medium, provided the original author and source are credited.

**Data Availability Statement:** There are restrictions on publicly sharing the complete minimal data for this study because it contains potentially identifying patient information and it is restricted to maintain patient confidentiality. Data are available up on request from Birhan Wale (Department of Obstetrics and Gynecology, St. Paul's Hospital Millennium Medical College (SPHMMC)) via email ([birhan.wale@sphmmc.edu.et](mailto:birhan.wale@sphmmc.edu.et)) for researchers

## Abstract

### Objective

To describe indications, test types, and results of prenatal diagnostic genetic amniocentesis among Ethiopian pregnant women.

### Methods

This study was a descriptive study on prenatal diagnostic genetic testing among Ethiopian pregnant women with certain indications and it was conducted at St. Paul's Hospital Millennium Medical College (Addis Ababa, Ethiopia) from January 2017 to April 2023. Data on sociodemographic characteristics, genetic testing indications, types, and results were collected electronically. Data were analysed using SPSS version 23.

### Results

A total of 159 cases were analysed. The commonest indication for genetic testing among the study subjects was major fetal structural anomalies identified on specialized prenatal anatomic scanning of the index pregnancy detected in 71(44.7%) cases. Down syndrome and Edward syndrome were the commonest genetic aberrations detected accounting for 6.3% (10/159) and 4.4% (7/159), respectively. Among the rare genetic aberration detected were Di-George syndrome (0.6%) and Duchenne muscular dystrophy (0.6%).

### Conclusion

Findings of our study underscore the importance of diagnostic prenatal testing in a Sub-Saharan Africa setting, as common (trisomy 21&18) and rare genetic defects were identified using this important prenatal diagnostic testing. Considering the implications of detecting chromosomal abnormalities for future counselling and care, carrier state in parents for some chromosomal anomalies, and planning post-natal management of some abnormalities that

who meet the criteria for access to confidential data.

**Funding:** The author(s) received no specific funding for this work.

**Competing interests:** The authors have declared that no competing interests exist.

are associated with aneuploidies (notably cardiac anomalies), initiation of diagnostic prenatal genetic testing service at tertiary public health facilities should be acted up on.

## 1. Introduction

Prenatal genetic testing is classified as invasive and non-invasive prenatal genetic testing (NIPT) [1]. NIPT has an advantage of low false positivity rate [1, 2]. Moreover, it can be used for screening at an earlier gestation. These advantages make it more preferable than the other invasive diagnostic testing procedures, which are chronic villus sampling (CVS) and genetic amniocentesis [3–5]. Serious genetic conditions such as: Trisomy 21 (Down syndrome), Trisomy 13 (Patau syndrome), Trisomy 18 (Edward syndrome), Monosomy X (Turner syndrome), and Klinefelter syndrome (XYY syndrome) carry high risk of miscarriage or infant mortality. Even if the babies survive it, there will be a long-term sequelae that will affect parents' and child's quality of life [6, 7]. Although NIPT is more preferable than genetic amniocentesis or CVS for screening these serious conditions, the technical know-how about the testing and unavailability of skilled personnel make it inaccessible in low-income countries, compared to the invasive ones [8, 9].

Traditionally, fetal chromosome analysis has been performed using karyotyping with samples taken through chorionic villus sampling (CVS) or amniocentesis. However, this traditional method has a disadvantage of being time-consuming and labor intensive [10–12]. As of 2002, a Multiplex ligation-dependent probe amplification (MLPA) has appeared as an alternative molecular method of chromosomal analysis that allows the relative quantification of DNA sequences, has largely replaced traditional karyotyping as it can detect copy number variation in genomic sequences and be used to identify deletions and duplications at a submicroscopic level using as little as 50ng of DNA [13, 14]. A recent study shows that using specialized probe sets MLPA detects more chromosomal rearrangements, conferring significant risk of adverse outcome than karyotyping [15].

In General, genetic testing in Africa is limited to some academic centers or National Health Laboratory centers and it is mostly the invasive type. For example, in south Africa, there are well organized but small genetic services, based mostly in academic centers, provincial health departments and the National Health Laboratory Service [16].

Currently, there is scarce literature regarding diagnostic prenatal genetic testing and patterns of chromosomal abnormalities in high-risk mothers in an African setting. In Ethiopia, there are no well-established prenatal genetic counselling and testing centers. In Ethiopia, clinicians have been using first-trimester combined screening to assign the genetic risk to the patients in the first trimester. Recently, prenatal diagnostic genetic testing (genetic amniocentesis) has been practiced at our Hospital, St. Paul's Millennium Medical College (Addis Ababa, Ethiopia), in concert with an in-country private genetic testing centre. Our study aimed to describe indications, test types, and results of prenatal genetic testing among Ethiopian pregnant women.

## 2. Methods and materials

### 2.1 Study design, setting, and population

This was a retrospective descriptive study on prenatal diagnostic genetic testing in a population of Ethiopian pregnant women and was conducted from May 5, 2023 to August 5, 2023. The study setting is St. Paul's Hospital Millennium Medical College, is a tertiary

leading referral hospital in Ethiopia for advanced patient diagnostics and treatment including advanced maternal-fetal medicine diagnostic and therapeutic interventions. It nests the biggest Maternal-fetal medicine center in Ethiopia, which is fully engaged in sub-specialty level care for Ethiopian pregnant women as well as delivering a high-quality sub-specialist training for fellows enrolled in the institution, who come from different parts of Ethiopia.

St. Paul's Hospital Millennium Medical College (SPHMMC) has recently improved their ability to prenatally screen for and diagnose congenital anomalies and genetic diseases. This has been accomplished through training of maternal-fetal medicine (MFM) specialists with prenatal ultrasound expertise, genetic counselling education of nurses and availability of in-country diagnostic genetic testing (MRC-ET Advanced Laboratory, the only private genetic testing center in Ethiopia) able to detect pregnancies affected with aneuploidies and select microdeletion/microduplication syndromes [17]. In our hospital, both combined first-trimester and second-trimester screening test are provided prenatally to pregnant women and based on the results of this screening test and further genetic counselling and genetic amniocentesis is provided to those found to be at high-risk for genetic anomalies. In this study, all cases of pregnant women who had follow-up at our Hospital and a near-by private centre who had been managed by our MFM specialists and fellows and that had prenatal genetic test for specific indications: major structural anomalies or soft markers for aneuploidy on detailed ultrasound in the second or third trimester, high risk for aneuploidies labelled based on a combination of maternal risk factors, USG, and serum analytes, were retrospectively analyzed. The diagnostic genetic test was done exclusively on amniotic fluid samples obtained from genetic amniocentesis. MLPA (multiplex ligation-dependent probe amplification) PCR was used to perform all the genetic tests. No traditional karyotyping nor microarray nor sequencing was utilized in this study. No sample size calculation was applied. The exclusion criteria were those with incomplete data.

## 2.2 Data collection procedure

Data were extracted from amniocentesis registry at SPHMMC and genetic testing registry at MRC-ET Advanced Laboratory, where all the study subjects had their prenatal genetic testing, over a period of 6 years (from January 2017 till April 2023). The medical records of the study subjects were accessed from May 5, 2023, to June 5, 2023. Data on sociodemographic characteristics, genetic testing indications, types, and results were collected electronically, retrospectively. Non-random sampling technique was used during data collection, in which consecutive cases with complete data were included in the study.

## 2.3 Ethical consideration

A formal Ethical clearance letter was obtained for this study from St. Paul's Hospital Millennium Medical College Institutional Review Board (IRB) on May 2, 2023. Data were fully anonymized before we accessed them and the IRB waived the requirement for informed consent. Hence, informed consent was not obtained from the study participants.

## 2.4 Data processing and analysis

Data were analysed using SPSS version 23. Simple descriptive analysis were used to analyse the data. Indications, test types, and chromosomal changes of prenatal genetic testing were analyzed. Frequency and proportions were used to present the results.

### 3. Results

Out of 186 pregnant women who had prenatal genetic testing, 159 were included in the final analysis after 27 cases were excluded due to incomplete data. The commonest indication for genetic amniocentesis and testing among the study subjects was major fetal structural anomalies identified on detailed sonography of the index pregnancy (Table 1). Seventy-one (44.7%) had major fetal structural anomaly as an indication for genetic testing, followed by another 21.4% (34/159) and 12.6% (20/159) who had prenatal genetic testing for high risk of Down syndrome and Edward syndrome respectively.

From those who had major structural anomalies, 29 (18.2%) cases had fetal ventriculomegaly, 11 (6.9%) cases had multiple congenital anomalies, 8 (5%) cases had renal anomalies, and another 6 (3.8%) fetal cardiac anomalies. Eighteen (11.3%) study subjects had their prenatal genetic testing for sonographic soft markers of aneuploidy ((increased nuchal fold, choroid plexus cyst, cystic hygroma, and single umbilical artery). Two pregnant women (1.3%) had history of previous affected child with Duchene's muscular dystrophy as an indication for the prenatal genetic testing. Chromosomal analysis was the predominant genetic test type employed during the study period, accounting for 64.8% (103/159), followed by peripheral chromosomal analysis (12.6%, 20/159) and Karyotype/trisomy (9.4%, 15/159).

Analysis of genetic testing results showed that Down syndrome and Edward syndrome were the commonest genetic aberrations detected accounting for 6.3% (10/159) and 4.4% (7/159), respectively (Table 2). Patau syndrome, Di-George syndrome, Turner syndrome, and carrier for Duchenne muscular dystrophy were identified each in single pregnant woman representing each 0.63%.

### 4. Discussion

In this study, the most common indications for prenatal genetic testing were sonographic findings of major fetal structural anomalies, high risk for trisomy 21 and 18, and findings of soft

**Table 1. Demographic characteristics, indication for genetic amniocentesis and diagnostic genetic test types for Ethiopian pregnant women who had prenatal genetic testing, 2017–2023.**

| Variable                        | Category                                                                                                             | n    | %        |
|---------------------------------|----------------------------------------------------------------------------------------------------------------------|------|----------|
| Maternal age                    | Mean                                                                                                                 | 30.2 | (19, 42) |
| Place of antenatal care         | Government hospital (SPHMMC)                                                                                         | 97   | 61       |
|                                 | Private practice                                                                                                     | 62   | 39       |
| Indications for Genetic testing | Major structural anomalies                                                                                           | 71   | 44.7     |
|                                 | High risk for Down Syndrome                                                                                          | 34   | 21.4     |
|                                 | High risk for Edward syndrome                                                                                        | 20   | 12.6     |
|                                 | Soft markers of aneuploidy (increased nuchal fold, choroid plexus cyst, cystic hygroma, and single umbilical artery) | 18   | 11.3     |
|                                 | Non-immune hydrops                                                                                                   | 4    | 2.5      |
|                                 | IUGR                                                                                                                 | 3    | 1.9      |
|                                 | Prior child with muscular dystrophy (Duchene's).                                                                     | 2    | 1.3      |
|                                 | Others (unexplained elevated AFP, encephalomegaly, advanced maternal age, on maternal request, and history of CHD)   | 7    | 4.4      |
| Genetic test type               | Chromosomal Analysis                                                                                                 | 103  | 64.8     |
|                                 | Peripheral Chromosomal Analysis                                                                                      | 20   | 12.6     |
|                                 | Karyotype/trisomy                                                                                                    | 15   | 9.4      |
|                                 | Trisomy/ Karyotyping/ Microdeletion syndrome                                                                         | 13   | 8.2      |
|                                 | Others                                                                                                               | 5    | 3.1      |
|                                 | Duchenne Muscular Dystrophy (DMD)                                                                                    | 2    | 1.3      |
|                                 | Turner syndrome                                                                                                      | 1    | 0.6      |

<https://doi.org/10.1371/journal.pone.0294409.t001>

**Table 2. Amniotic fluid genetic testing results: Chromosomal changes for Ethiopian pregnant women who had prenatal genetic testing, 2017–2023.**

| Chromosomal changes (Abnormalities)                                                                                                                                                    | n   | %    |
|----------------------------------------------------------------------------------------------------------------------------------------------------------------------------------------|-----|------|
| Normal (No change)                                                                                                                                                                     | 130 | 81.8 |
| Trisomy 18(Edward syndrome)                                                                                                                                                            | 10  | 6.3  |
| Trisomy 21 (Down syndrome)                                                                                                                                                             | 7   | 4.4  |
| Trisomy 13(Patau syndrome)                                                                                                                                                             | 1   | 0.63 |
| Monosomy-X (Turner syndrome)                                                                                                                                                           | 1   | 0.63 |
| Carrier for Duchenne Muscular Dystrophy                                                                                                                                                | 1   | 0.63 |
| Consistent with Di-George affected patients (Exons on the genes TBX5, exons 2, 3, 5, 8 and 9, GATA4 exons 5, 6 and 7)                                                                  | 1   | 0.63 |
| Chromosome 10 (heterozygous duplication)                                                                                                                                               | 1   | 0.63 |
| Ambiguous copy number changes of Congenital heart defect related genes                                                                                                                 | 1   | 0.63 |
| Others (Exon 3 of EVC and EVC2 genes, Exons 8–12 of PLOD1 gene located on chromosomal region 1p36, TBX1, Chromosomes 5 and 6, Chromosomes 22 and 4, and multiple chromosomes affected) | 6   | 3.8  |

<https://doi.org/10.1371/journal.pone.0294409.t002>

markers of fetal aneuploidy. The most frequently detected genetic aberrations were Trisomy 18(Edward syndrome), trisomy 21(Down syndrome). Among the rarest genetic abnormalities were Patau syndrome, Di-George syndrome, Turner syndrome, and carrier for Duchenne muscular dystrophy.

Genetic counselling has been shown to be an effective intervention in decreasing the negative impact of congenital anomalies and genetic conditions. However; this intervention is not available in most sub-Saharan Africa countries [18], and little is known regarding the practice of this testing in this region of Africa, compared to the developed part of Africa. Prenatal genetic diagnosis has been accessible at tertiary care levels across South Africa since the early 2000s [16]. An earlier study from Cameroon found a poor knowledge of genetic tests among medical students and physicians [19]. Another study that employed a face-to-face interview to study 130 parents with a living child affected with Sickle Cell Anemia demonstrated majority (89.8%) from these parents accepted the principle of prenatal genetic diagnosis for Sickle Cell Anemia [20]. A recent study on knowledge and attitude in genetic counselling in major hospitals in Addis Ababa (Ethiopia) demonstrated that there is increasing demand for genetic testing in Ethiopia [21]. Earlier, a survey study on patient preferences for prenatal testing including prenatal genetic testing, found that Ethiopian patients have interest in doing prenatal testing including prenatal genetic testing. Above 90% of the respondents in the study expressed their preference for prenatal genetic testing for 14 fetal conditions including trisomy 13, monosomy-x(Turner syndrome), and Duchenne muscular dystrophy(DMD)(11), which were also among the indications for prenatal genetic testing as well as confirmed fetal genetic defects with this testing in our study. Major structural fetal anomalies and findings of soft markers for aneuploidy preceded by high risk for trisomy 18 & 21(the most common chromosomal defects identified) were among the commonest indications for genetic testing in the present study.

Central nervous system malformations detected on ultrasound are strongly associated with and predictive of chromosomal abnormalities, especially trisomy 13 and 18 [22]. Among the major fetal structural anomalies, the most common indication for prenatal genetic testing in this study was fetal ventriculomegaly(close to 1 in 5 of the indications, 18.2%, were for this structural anomaly). Ideally, amniocentesis should be performed on all patients with fetal ventriculomegaly [23] and Karyotyping will identify chromosomal anomalies in 3–11% of the cases, most often trisomy 21 [24–26]. In fetuses with trisomy 21 and trisomy 18, cardiac anomalies are the most common structural sonographic features [27]. This evidence demonstrates

the importance of having prenatal genetic testing in pregnancies complicated by major fetal structural anomalies.

Among the health problems that impose a heavy burden on families and a society in general are chromosome aneuploidies. The most common chromosome aneuploidies among fetuses are trisomy 21 (Down syndrome, T21), trisomy 18 (Edwards syndrome, T18), trisomy 13 (Patau syndrome, T13) [28]. From these, Down syndrome (DS) is the most commonly identified genetic form of mental retardation and the leading cause of specific birth defects and medical conditions [29]. In our study, this genetic defect was the commonest confirmed genetic disorder up on performing the genetic testing accounting for 6.3% (10/159) followed by Edward syndrome, which was identified in 7(4.4%) cases. There was only one case of Patau syndrome identified in this study. So were detected other rare genetic defects, namely Di-George syndrome, Turner syndrome, and carrier for Duchenne muscular dystrophy.

Although non-invasive prenatal genetic testing is being practiced worldwide, currently, invasive prenatal testing is still the most commonly practiced in low-income countries that includes Sub-Saharan Africa (SSA) [6]. Variations also exist in women's knowledge of prenatal genetic testing [30]. A US-based study found that African Americans and Latinos were less knowledgeable about genetic testing than Whites, and they were less likely to have the financial resources or insurance coverage that would facilitate access to the testing [31]. Full coverage of the cost of clinical genetic testing is not always available through public or private insurance programs, or a public healthcare system [32], which is also true in Ethiopia. Meeting the high patients' preferences for prenatal genetic testing with expansion of prenatal genetic testing service, as discussed above, can be an effective strategy to address congenital genetic defects in Ethiopia and beyond across the Sub-Saharan Africa. However, the issue of affordability should be parallelly addressed for a wider scale of access. It has been stated that diagnostic genetic testing in SSA deserves increased attention as testing platforms become more affordable [21]. This should be balanced with availability of an option of accessing it at a cheaper price for patients with limited resources, to ensure greater expansion of this testing service across the region.

We recommend initiation of diagnostic prenatal genetic testing service at a tertiary public health facility with Maternal-fetal medicine sup-speciality care in Sub-Saharan Setting including Ethiopia, for two reasons. One, considering the importance of detecting chromosomal abnormalities in the index pregnancy for future counselling and care, and the fact that it will open a window for testing carrier state in parents for some chromosomal anomalies. Secondly, it's importance neonatal screening and planning for management of some abnormalities that are associated with aneuploidies (notably cardiac anomalies).

Strengths of our study include being among the first studies from Africa to document the indications, test types, and test finding of prenatal genetic testing. The main limitations of this study are missing analysis of management approaches (pregnancy termination vs conservative management) and birth outcomes for those that had confirmed diagnosis of genetic defects. Retrospective data collection and lack of cost-benefit analysis are the other limitation of our study.

In conclusion, our study substantiates the practicality of diagnostic prenatal testing in a Sub-Saharan Africa setting with further evidence. It shows common (trisomy 21&18) and rare genetic defects (such as Di-George syndrome and Duchene's Muscular dystrophy) were identified by sending amniocentesis samples for prenatal genetic testing at the private center after proper screening and evaluation by our MFM experts, though the final management outcomes are lacking. We recommend further prospective studies inclusive of cost-benefit analysis of invasive prenatal genetic testing, with a goal of making it affordable for pregnant women with limited resources and at high risk of fetal genetic diseases.



## Acknowledgments

We would like to acknowledge the department of Obstetrics and Gynecology at St Paul's Hospital Millennium Medical College (Ethiopia) and MRC-ET Advanced Laboratory (Ethiopia).

## Author Contributions

**Conceptualization:** Abraham Fessehaye Sium, Tizibt Yiflashewa, Wondimu Gudu.

**Data curation:** Abraham Fessehaye Sium, Abdulfetah Abdulkadir Abdosh, Tesfaye Diress, Tigist Tsegaye, Zewdu Terefework, Wondimu Gudu.

**Formal analysis:** Abraham Fessehaye Sium, Wondimu Gudu.

**Investigation:** Abraham Fessehaye Sium.

**Methodology:** Abraham Fessehaye Sium, Tesfaye Diress, Wondimu Gudu.

**Project administration:** Abraham Fessehaye Sium, Abdulfetah Abdulkadir Abdosh, Wondimu Gudu.

**Resources:** Tigist Tsegaye, Tizibt Yiflashewa, Zewdu Terefework.

**Supervision:** Tariku Shimels, Abdulfetah Abdulkadir Abdosh, Wondimu Gudu.

**Validation:** Abraham Fessehaye Sium, Tariku Shimels, Tesfaye Diress, Tigist Tsegaye, Tizibt Yiflashewa, Zewdu Terefework, Wondimu Gudu.

**Writing – original draft:** Abraham Fessehaye Sium, Tariku Shimels, Abdulfetah Abdulkadir Abdosh, Tesfaye Diress, Tigist Tsegaye, Tizibt Yiflashewa, Zewdu Terefework, Wondimu Gudu.

**Writing – review & editing:** Abraham Fessehaye Sium, Tariku Shimels, Wondimu Gudu.

## References

1. Minear MA, Alessi S, Allyse M, Michie M, Chandrasekharan S. Noninvasive prenatal genetic testing: current and emerging ethical, legal, and social issues. *Annual review of genomics and human genetics*. 2015 Aug 24; 16:369–98. <https://doi.org/10.1146/annurev-genom-090314-050000> PMID: 26322648
2. Kelly SE, Farrimond HR. Non-invasive prenatal genetic testing: a study of public attitudes. *Public health genomics*. 2012; 15(2):73–81. <https://doi.org/10.1159/000331254> PMID: 22094262
3. Leach MW. ACOG issues new prenatal testing guidelines. <https://prenatalinformation.org/2016/04/29/acog-issues-new-prenatal-testing-guidelines/>. Updated April 29, 2016. Accessed November 11, 2017.
4. Chandrasekharan S, Minear MA, Hung A, Allyse MA. Noninvasive prenatal testing goes global. *Sci Transl Med*. 2014; 6:231fs15. <https://doi.org/10.1126/scitranslmed.3008704> PMID: 24718856
5. Driscoll DA, Gross SJ. Screening for fetal aneuploidy and neural tube defects. *Genet Med*. 2009; 11:818–821. <https://doi.org/10.1097/GIM.0b013e3181bb267b> PMID: 19915395
6. Allyse M, Minear MA, Berson E, et al. Non-invasive prenatal testing: a review of international implementation and challenges. *Int J Womens Health*. 2015; 7:113–126. <https://doi.org/10.2147/IJWH.S67124> PMID: 25653560
7. Norwitz ER, Levy B. Noninvasive prenatal testing: the future is now. *Rev Obstet Gynecol*. 2013; 6:48–62. PMID: 24466384
8. Gaivoronskaia G, Solem KE. Genetic testing: affected parties and decision making. *J Risk Res*. 2004; 7:481–493. <https://doi.org/10.1080/1366987042000146201>.
9. Phan MD, Nguyen TV, Trinh HN, Vo BT, Nguyen TM, Nguyen NH, et al. Establishing and validating noninvasive prenatal testing procedure for fetal aneuploidies in Vietnam. *The Journal of Maternal-Fetal & Neonatal Medicine*. 2019 Dec 2; 32(23):4009–15. <https://doi.org/10.1080/14767058.2018.1481032> PMID: 29865915
10. Witters I, Devriendt K, Legius E, Matthijs G, Van Schoubroeck D, Van Assche FA, et al. Rapid prenatal diagnosis of trisomy 21 in 5049 consecutive uncultured amniotic fluid samples by fluorescence in situ hybridisation (FISH). *Prenat Diagn* 2002; 22:29–33. <https://doi.org/10.1002/pd.225> PMID: 11810646

11. Levett LJ, Liddle S, Meredith R. A large-scale evaluation of amnio-PCR for the rapid prenatal diagnosis of fetal trisomy. *Ultrasound Obstet Gynecol* 2001; 17:115–118. <https://doi.org/10.1046/j.1469-0705.2001.00340.x> PMID: 11251918
12. Mann K, Fox SP, Abbs SJ, Yau SC, Scriven PN, Docherty Z, et al. Development and implementation of a new rapid aneuploidy diagnostic service within the UK National Health Service and implications for the future of prenatal diagnosis. *Lancet* 2001; 358:1057–1061. [https://doi.org/10.1016/S0140-6736\(01\)06183-9](https://doi.org/10.1016/S0140-6736(01)06183-9) PMID: 11589937
13. Schouten JP, McElgunn CJ, Waaijer R, Zwijnenburg D, Diepvens F, Pals G. Relative quantification of 40 nucleic acid sequences by multiplex ligation-dependent probe amplification. *Nucleic Acids Res* 2002; 30:e57. <https://doi.org/10.1093/nar/gnf056> PMID: 12060695
14. Ahn JW, Mann K, Docherty Z, Mackie Ogilvie C. Submicroscopic chromosome imbalance in patients with developmental delay and/or dysmorphism referred specifically for Fragile X testing and karyotype analysis. *Mol Cytogenet* 2008; 26:1–2. <https://doi.org/10.1186/1755-8166-1-2> PMID: 18471307
15. Chitty LS, Kistler J, Akolekar R, Liddle S, Nicolaides K, Levett L. Multiplex ligation-dependent probe amplification (MLPA): a reliable alternative for fetal chromosome analysis?. *The Journal of Maternal-Fetal & Neonatal Medicine*. 2012 Aug 1; 25(8):1383–6. <https://doi.org/10.3109/14767058.2011.636093> PMID: 22098527
16. Kromberg JG, Sizer EB, Christianson AL. Genetic services and testing in South Africa. *Journal of Community Genetics*. 2013 Jul; 4:413–23. <https://doi.org/10.1007/s12687-012-0101-5> PMID: 22711384
17. Brooks D, Asta K, Sturza J, Kebede B, Bekele D, Nigatu B, et al. Patient preferences for prenatal testing and termination of pregnancy for congenital anomalies and genetic diseases in Ethiopia. *Prenatal Diagnosis*. 2019 Jul; 39(8):595–602. <https://doi.org/10.1002/pd.5472> PMID: 31063215
18. Quinonez SC O'Connor BC, Jacobs MF, Mekonnen Tekleab A, Marye A, Bekele D, et al. The introduction of genetic counseling in Ethiopia: Results of a training workshop and lessons learned. *Plos one*. 2021 Jul 23; 16(7):e0255278. <https://doi.org/10.1371/journal.pone.0255278> PMID: 34297771
19. Wonkam A., Njamnshi A. & Angwafo F. Knowledge and attitudes concerning medical genetics amongst physicians and medical students in Cameroon (sub-Saharan Africa). *Genet Med* 8, 331–338 (2006). <https://doi.org/10.1097/01.gim.0000223542.97262.21> PMID: 16778594
20. Wonkam A., Njamnshi A.K., Mbanya D. et al. Acceptability of Prenatal Diagnosis by a Sample of Parents of Sickle Cell Anemia Patients in Cameroon (Sub-Saharan Africa). *J Genet Counsel* 20, 476–485 (2011). <https://doi.org/10.1007/s10897-011-9372-y> PMID: 21604069
21. Jacobs MF O'Connor BC, Weldetsadik AY, Tekleab AM, Bekele D, Hanson E, et al. Knowledge and attitudes about genetic counseling in patients at a major hospital in Addis Ababa, Ethiopia. *Journal of Genetic Counseling*. 2021 Apr; 30(2):544–52. <https://doi.org/10.1002/jgc4.1340> PMID: 33118289
22. Goetzing KR, Stamilio DM, Dicke JM, Macones GA, Odibo AO. Evaluating the incidence and likelihood ratios for chromosomal abnormalities in fetuses with common central nervous system malformations. *American journal of obstetrics and gynecology*. 2008 Sep 1; 199(3):285–e1. <https://doi.org/10.1016/j.ajog.2008.06.100> PMID: 18771985
23. Chiu TH, Haliza G, Lin YH, Hung TH, Hsu JJ, Lo LM. A retrospective study on the course and outcome of fetal ventriculomegaly. *Taiwanese Journal of Obstetrics and Gynecology*. 2014 Jun 1; 53(2):170–7. <https://doi.org/10.1016/j.tjog.2014.04.008> PMID: 25017261
24. Wyldes M, Watkinson M. Isolated mild fetal ventriculomegaly. *Arch Dis Child Fetal Neonatal Ed* 20.
25. Melchiorre K, Bhide A, Gika AD, Pilu G, Papageorgiou AT. Counseling in isolated mild fetal ventriculomegaly. *Ultrasound Obstet Gynecol* 2009; 34(2):212–224. <https://doi.org/10.1002/uog.7307> PMID: 19644944
26. Sethna F, Tennant PW, Rankin J, Robson S. Prevalence, natural history, and clinical outcome of mild to moderate ventriculomegaly. *Obstet Gynecol* 2011; 117(4):867–876. <https://doi.org/10.1097/AOG.0b013e3182117471> PMID: 21422858
27. Papp C, Szigeti Z, Tóth-Pál E, Hajdú J, Joó JG, Papp Z. Ultrasonographic findings of fetal aneuploidies in the second trimester—our experiences. *Fetal diagnosis and therapy*. 2008; 23(2):105–13. In the present study, cardiac anomalies were among the common major structural anomalies and an indication for prenatal genetic testing. <https://doi.org/10.1159/000111588> PMID: 18033966
28. Boormans EM, Birnie E, Wildschut HI, Schuring-Blom HG, Oepkes D, van Oppen CA, et al. Multiplex ligation-dependent probe amplification versus karyotyping in prenatal diagnosis: the M. A.K.E. Study. *BMC Pregnancy Childbirth*. 2008; 8:18.
29. Sherman SL, Allen EG, Bean LH, Freeman SB. Epidemiology of Down syndrome. *Mental retardation and developmental disabilities research reviews*. 2007; 13(3):221–7. <https://doi.org/10.1002/mrdd.20157> PMID: 17910090



30. Bryant AS, Norton ME, Nakagawa S, Bishop JT, Pena S, Gregorich SE, et al. Variation in women's understanding of prenatal testing. *Obstetrics and gynecology*. 2015 Jun; 125(6):1306. <https://doi.org/10.1097/AOG.0000000000000843> PMID: 26000501
31. Singer E, Antonucci T, Van Hoewyk J. Racial and ethnic variations in knowledge and attitudes about genetic testing. *Genetic testing*. 2004 Apr 1; 8(1):31–43. <https://doi.org/10.1089/109065704323016012> PMID: 15140372
32. Grant P, Langlois S, Lynd LD, GenCOUNSEL Study, Austin JC, Elliott AM. Out-of-pocket and private pay in clinical genetic testing: A scoping review. *Clinical genetics*. 2021 Nov; 100(5):504–21.
